1                   **Frequency of Depressive Symptoms and Suicidal Ideation Among**  
2                   **University Students Before and After the COVID-19 Pandemic**

3  
4   Mélissa Macalli, PhD <sup>a</sup>, Laura Castel, MSc <sup>a</sup>, Hélène Jacqmin-Gadda, PhD <sup>a</sup>, Marie Tournier, MD,  
5   PhD <sup>a,b</sup>, Cédric Galéra, MD, PhD <sup>a,b</sup>, Edwige Pereira, MSc <sup>a</sup>, Christophe Tzourio, MD, PhD <sup>a</sup>

6  
7   <sup>a</sup>Univ. Bordeaux, Inserm, Bordeaux Population Health Research Center, U1219, CHU Bordeaux, F-  
8   33000 Bordeaux, France.

9   <sup>b</sup>Psychiatry Hospital Charles Perrens, 33000 Bordeaux, France.

10  
11  
12  
13  
14  
15  
16  
17  
18  
19  
20   **Corresponding author:** Melissa Macalli or Christophe Tzourio, University of Bordeaux, 146 rue Léo  
21   Saignat, 33076 Bordeaux Cedex, Bordeaux, France ([melissa.macalli@u-bordeaux.fr](mailto:melissa.macalli@u-bordeaux.fr),  
22   [Christophe.tzourio@u-bordeaux.fr](mailto:Christophe.tzourio@u-bordeaux.fr))

**NOTE: This preprint reports new research that has not been certified by peer review and should not be used to guide clinical practice.**

23 **Abstract**

24 *Background:* The COVID-19 pandemic and lockdown have had negative effects on students' mental  
25 health. However, little information is available regarding the frequencies of depressive symptoms and  
26 suicidal ideation during the post-pandemic period. We aimed to compare prevalence rates of  
27 depressive symptoms and suicidal ideation among university students, before versus after the COVID-  
28 19 pandemic.

29 *Methods:* In this comparative study, 4464 students were recruited during the pre-COVID-19  
30 pandemic period (2013-2020) and 1768 students, during the post-COVID-19 pandemic period (2022-  
31 2023). Standardized frequencies of depressive symptoms and suicidal ideation were compared  
32 between the two time periods. Adjusted logistic regression models were used to assess the association  
33 between the pandemic period (with the pre-COVID-19 period as reference) and depressive symptoms  
34 and suicidal ideation.

35 *Results:* Compared to participants from the pre-pandemic sample, participants from the post-  
36 pandemic sample had higher standardized rates of depressive symptoms (40.6% vs 25.6%) and  
37 suicidal ideation (29.3% vs 21.1%). With adjustment for age, gender, university campus, scholarship,  
38 and past history of depression and suicide attempt, students in the post-pandemic period experienced  
39 more depressive symptoms (aOR, 1.89; 95% CI, 1.67-2.13) and suicidal ideation (aOR, 1.46; 95% CI,  
40 1.28-1.67) compared to students in the pre-COVID-19 era.

41 *Limitations:* The main limitations were self-selection bias and information bias due to potential over-  
42 reporting linked to media coverage, as well as measures of past history of depression and suicide  
43 attempt across the lifespan.

44 *Conclusions:* These findings reveal an alarming deterioration of students' mental health in the post-  
45 pandemic period compared to the pre-pandemic era. Pending replications in others countries, these  
46 results suggest that it is crucial to continue monitoring students' mental health, strengthening  
47 communication on this topic, and reinforcing university mental healthcare systems.

48

49 **Keywords:** COVID-19; University students; Depressive symptoms; Suicidal ideation.

## 50 **Introduction**

51 Although some studies showed that suicidal risk was stable or diminished during the pandemic (Appleby  
52 et al., 2021; Lopez et al.2021), other studies highlighted an increase in mental health problems and  
53 suicidality in different populations and age groups (Ettman et al., 2020; Viner et al., 2022; Giannouli et  
54 al., 2023). However, there are few recent data in the literature on the post-pandemic period, even for at-  
55 risk groups (Wang et al., 2022), e.g., university students. Before the COVID-19 pandemic, university  
56 students were known to exhibit a high prevalence of mental health problems, including depressive  
57 symptoms and suicidal ideation, in most countries (Auerbach et al., 2018), including France (Macalli et  
58 al., 2020). Several factors serve as an explanation as to why university students are such a vulnerable  
59 group to mental health disorders: academic stress, separation and individuation from their family, first  
60 onset of mental health or substance use problems. This pre-existing vulnerability was exacerbated by  
61 the COVID-19 pandemic and the associated lockdowns (Arsandaux et al., 2021; Wathélet et al., 2020).  
62 Thus, a previous study showed that students were more likely to have high scores of depressive  
63 symptoms and anxiety more frequently than non-students during the lockdown (Macalli et al., 2021).  
64 Furthermore, a study conducted among 664 university students in Germany showed that the rate of  
65 students suffering from suicidal ideation was twice as high in 2020 than in previous years from 2016 to  
66 2019 (Brailovskaia et al., 2021). However, to our knowledge, few studies have assessed university  
67 students' mental health situation during the current post-pandemic period in comparison to the pre-  
68 pandemic period. In the present study, we assessed and compared the prevalence rates of depressive  
69 symptoms and suicidal ideation among French university students before versus after the COVID-19  
70 pandemic.

71

## 72 **Methods**

### 73 **Study Design and Sample**

74 We conducted a comparative analysis using baseline data from two studies of French student  
75 volunteers: i-Share and Prisme, which both focused on students' health and its determinants. These  
76 studies used similar recruitment methods (social networks, mailings, meetings at stands and in lecture  
77 halls, and a peer-to-peer approach), eligibility criteria (officially registered at a university or higher

78 education institute, at least 18 years of age, and provided informed consent for participation), data  
79 collection method (online questionnaires), and measures of mental health parameters. In i-Share,  
80 students were enrolled from 2013 to 2020, mainly at Bordeaux university, but also at other French  
81 universities. Students enrolled in the i-Share cohort after March 17, 2020 (date of first lockdown in  
82 France) were not included in the current study. In Prisme, participants were recruited from September  
83 2022 to February 2023 at Bordeaux university only. To optimize comparability of samples, we  
84 restricted the i-Share sample to students from Bordeaux university (pre-COVID-19 pandemic sample,  
85 N = 4464). This sample was compared to the Prisme sample (post-COVID-19 pandemic sample, N =  
86 1768). Regulatory approvals were obtained for both studies. The National Commission for  
87 Information Technology and Liberties (CNIL) [DR-2013-019] approved the i-Share study. The  
88 regional south-east VI ethics committee (*Comite de Protection des Personnes Sud Est VI*) approved  
89 the Prisme study (under the National Number 2022-A00666-37). No compensation was paid for  
90 participation in either study.

91

## 92 **Measures**

93 Depressive symptoms were measured using the French version of the 9-item Patient Health  
94 Questionnaire (PHQ-9), the most commonly used tool for screening for depression (Levis et al., 2019).  
95 We used a validated cut-off of 10 to define the presence of depressive symptoms (Kroenke et al.,  
96 2001). Suicidal ideation was measured using the following question: “In the past 12 months, have you  
97 ever had suicidal thoughts?” In our analyses, we considered the following variables: COVID-19  
98 pandemic period (pre- and post-pandemic), age, gender, university campus (to inform on study fields),  
99 scholarship (allocated on social and economic criteria), year of study, perceived stress (measured by  
100 the Perceived stress scale-4), and past history of depression and suicide attempt.

101

## 102 **Statistical Analysis**

103 We first compared the pre-pandemic and post-pandemic samples in terms of mental health and socio-  
104 demographic characteristics. To obtain more precise estimates of mental health variables, by  
105 accounting for the structural differences of the samples, we re-estimated these variables after

106 standardizing the post-pandemic sample structure based on the pre-pandemic sample. To this end, we  
107 used the raking ratio method with three margin variables—namely, gender, age, and university campus  
108 (macro SAS CALMAR). Finally, to assess the association between the pandemic period (post-  
109 pandemic versus pre-pandemic as reference) and the two outcomes, i.e., depressive symptoms and  
110 suicidal ideation, we used multivariable logistic regression models for each outcome. Multivariable  
111 logistic regression models were performed for the total sample (pre-epidemic and post-epidemic  
112 without raking): 1) to estimate the probability of occurrence of depressive symptoms and suicidal  
113 ideation among students in the post-epidemic period compared with students in the pre-epidemic  
114 period; 2) to conduct a sensitivity analysis adjusted for confounding factors (scholarship, past  
115 depression (for depressive symptoms), or suicide attempt (for suicidal ideation)). In secondary  
116 analyses, to clarify the comparison between the post-COVID period (from September 2022 to  
117 February 2023) with the preceding seven years' pre-era, we repeated the analyses limiting the pre-  
118 pandemic sample to the three previous years before the pandemic (2018-2020).

119

## 120 **Results**

121 Participants in the pre-pandemic sample were slightly older (mean age, 20.4 years; SD = 2.6; N =  
122 4464) than participants in the post-pandemic sample (mean age, 19.9 years; SD = 2.7; N = 1768)  
123 (Table 1). The two samples had similar gender distribution (77.9% women in the pre-pandemic, and  
124 80.8% in the post-pandemic sample), and socio-economic status measured by scholarship (41.8% in  
125 the pre-pandemic, and 45.1% in the post-pandemic sample). Compared to participants in the pre-  
126 pandemic sample, participants in the post-pandemic sample had higher rates of depressive symptoms  
127 (43.3% vs. 25.6%) and suicidal ideation (30.6% vs 21.1%). Other mental health parameters (high  
128 perceived stress, and past history of depression and suicide attempt) were also higher in the post-  
129 pandemic sample than in the pre-pandemic sample (Table 1).

130 After standardizing the post-pandemic sample based on the pre-pandemic sample's distributions of  
131 gender, age, and university campus, we found that the estimated prevalence rates of depressive

132 symptoms (40.6%) and suicidal ideation (29.3%) in the post-pandemic sample were lower than before  
133 standardization, but these estimates remained higher than those in the pre-pandemic sample (Table1).

134 A comparison of socio-demographic characteristics according mental health outcomes in each sample  
135 showed that students who reported depressive symptoms and suicidal ideation were more likely  
136 female, first year and scholarship students, whatever the period. They were also more likely to present  
137 high perceived stress and past history of depression or suicide attempt than those who declared no  
138 depressive symptoms nor suicidal ideation (Supplementary material table 1).

139 We also performed multivariate analyses, with adjustments for age, gender, university campus,  
140 scholarship, and past history of depression or suicide attempt. These results showed that compared to  
141 participants from the pre-pandemic sample, participants from the post-pandemic sample had an  
142 approximately 90% increased risk of depressive symptoms (aOR, 1.89; 95% CI, 1.67-2.13) and an  
143 approximately 50% increased risk of suicidal ideation (aOR, 1.46; 95% CI, 1.28-1.67) (Table 2).  
144 Female gender (aOR, 1.72; 95% CI, 1.49-2.00), university campus of Bordeaux Montaigne i.e.  
145 humanities and social sciences (in reference to Bordeaux campus, i.e. sciences and health section;  
146 aOR, 1.39; 95% CI, 1.21-1.59), scholarship (aOR, 1.20; 95% CI, 1.07-1.37), and past history of  
147 depression (aOR, 2.95; 95% CI, 2.52-3.46) were associated to a higher probability to report depressive  
148 symptoms. Students who reported suicidal ideation were more likely to declare past history of suicide  
149 attempt (aOR, 5.22; 95% CI, 4.27-6.39) (Table 2).

150  
151 The description of prevalences per year in the i-Share cohort from 2013 to 2020 show a slight uptick  
152 in depression symptoms and a stability in suicidal ideation, but not a clear trend (Supplementary  
153 Material Table 2). In secondary analyses on a subsample (n=569) limited to the three years before the  
154 pandemic (2018-2020), participants in the post-pandemic period had higher rates of depressive  
155 symptoms (43.3% vs. 28.5%) and suicidal ideation (30.6% vs 21.8%) compared to participants in the  
156 pre-era (Supplementary Material Table 3). In multivariate analyses, participants from the post-  
157 pandemic sample were more likely to report depressive symptoms (aOR, 1.61; 95% CI, 1.29-2.00) and

158 suicidal ideation (aOR, 1.42; 95% CI, 1.11-1.80) compared to participants from the pre-pandemic  
159 sample (Supplementary Material Table 4).

160

## 161 **Discussion**

162 The present results showed that compared to participants from the pre-pandemic sample, those in the  
163 post-pandemic sample had higher rates of depressive symptoms and suicidal ideation. Previous studies  
164 have shown that young adults, including students, were strongly exposed to depressive disorders  
165 during the COVID-19 pandemic (Bliddal et al., 2023; COVID-19 Mental Disorders Collaborators.,  
166 2021; Léon et al., 2023). For instance, a study conducted among 884 college students in Northern  
167 Ireland and Republic of Ireland from 2019 to 2020 found a large increase in depression by over 10%  
168 (McLafferty, et al., 2021). Our findings suggest that this increased frequency of depressive disorders is  
169 persisting after the pandemic, rather than returning to normal. A similar observation was reported after  
170 the SARS pandemic in 2002, with some studies reporting long-term psychiatric implications,  
171 particularly among the survivors (Lee et al., 2007).

172 As student mental health has steadily declined over the past decade, we can assume that the higher  
173 prevalence of depressive symptoms and suicidal ideation in 2022-2023 may be part of the ongoing  
174 trend. However, the description of prevalences per year in the i-Share cohort from 2013 to 2020 did  
175 not show a regular increase across years. Furthermore, the analyses limited on a subsample of the last  
176 three years before the pandemic confirmed our global results suggesting an increase in mental health  
177 problems in the post-COVID period rather than a continuum of an existing trajectory.

178 The literature includes only sparse and inconsistent findings of whether the aggravation of mental  
179 health problems during the COVID-19 pandemic also manifested as changes in suicidality. Some  
180 studies have shown no change in suicidal ideation at the beginning of the pandemic (Knudsen et al.,  
181 2021; Pirkis et al., 2021) or after the lockdown (Danielson et al., 2023), while others have found an  
182 increase of suicidal ideation (Huang et al., 2022). In a study conducted among 4693 Canadian  
183 university students, Jones et al. observed an initial drop of suicidal ideation followed by an increasing  
184 trend, suggesting the possibility of delayed impact (Jones et al., 2023). Likewise, a large study

185 conducted among 44 898 university students found that the prevalence of suicidal ideation increased  
186 between the first lockdown (10.6%) in France and August 2021, 15 months later (13.8%) (Wathelet et  
187 al., 2022). In this study, in line with our findings, female, students with financial difficulties or  
188 psychiatric history, were at risk of mental health problems.

189 There has been no previous report of the frequency of suicidal ideation among students during the  
190 current post-pandemic period in comparison with the pre-era, and our results suggest that there is a  
191 possible long-term impact. The aggravation of students' mental health problems during the post-  
192 pandemic period may have various causes, including the economic crisis and persistent anxiety about  
193 global warming in this population. Nevertheless, we think that an exacerbation of this magnitude is  
194 partly attributable to the COVID-19 pandemic and the lockdowns, which have been traumatic in this  
195 population, as they dramatically limited interactions with teachers and peers for several months  
196 (Macalli et al., 2021). Some studies revealed a high prevalence of mental health disorders, including  
197 anxiety, and depression among students, in the post-Covid era (Chen et al., 2023; Cheng et al., 2023).  
198 Contrary to our study, one recent research conducted among Italian university students showed that  
199 the freshmen recruited after the pandemic presented less psychological distress than freshmen  
200 recruited before the pandemic. However, 78% of the freshmen stated that the pandemic had an impact  
201 on their social relationships (Buizza et al., 2023). The WHO revealed that, faced with extended  
202 university closures, young people have been left vulnerable to social isolation which can lead to  
203 anxiety, uncertainty, loneliness and behavioral problems (WHO, 2022). We can assume that the  
204 reconstruction and recovery of certain social and personal skills may take time and lead to some  
205 mental exhaustion. In addition, mental health services, already inadequate before the epidemic, may  
206 have been overburdened, resulting in ineffective or delayed treatment.

207

## 208 **Strengths and Limitations**

209 Main strengths of this study included the relatively large samples of students (pre-pandemic N = 4664;  
210 post-pandemic N = 1768) recruited from the same university, using similar recruitment methods, and  
211 using the same validated tools to evaluate mental health. Notably, both studies would have been



212 similarly affected by self-selection bias, which is inherent to community-based studies. Nevertheless,  
 213 this bias limits the generalizability of our findings. Another potential limitation is the possibility that  
 214 media coverage of the impact of the pandemic on mental health may have led to over-reporting of  
 215 mental health disorders during the post-pandemic period. However, although this could have been the  
 216 case during the pandemic and lockouts periods, it seems rather unlikely that it would have a major  
 217 impact in the current post-pandemic period, during which these topics have vanished from the media.  
 218 Because past depression and past suicide attempt were queried across the lifespan in both studies, we  
 219 cannot use this questionnaire to distinguish whether they occurred in the pre-epidemic period or during  
 220 the epidemic in the post-Covid sample. Similarly, we cannot determine whether or not past mental  
 221 disorders are related to current mental health status. However, we did account for this important  
 222 confounder in our models.

223

## 224 **Conclusions**

225 The present findings reveal an alarming deterioration of students' mental health in the post-pandemic  
 226 period compared to in the pre-pandemic period. These results remain to be replicated in other settings  
 227 and other countries, but they suggest that it is crucial to continue monitoring students' mental health,  
 228 strengthening communication on this topic, and reinforcing university mental healthcare systems.

229

230 **Table 1. Comparison of Key Variables Between Pre- and Post-COVID-19 Samples**

| <b>Characteristic, N (%)</b>                   | <b>Pre-pandemic sample (N = 4664)</b> | <b>Post-pandemic sample (N = 1768)</b> | <b>Standardized post-pandemic sample (N = 4664)</b> |
|------------------------------------------------|---------------------------------------|----------------------------------------|-----------------------------------------------------|
| <b>Female</b>                                  | 3634 (77.9)                           | 1429 (80.8)                            | 3634 (77.9)                                         |
| <b>Age, mean (SD)</b>                          | 20.4 (2.6)                            | 19.9 (2.7)                             | 20.4 (2.9)                                          |
| <b>University campus</b>                       |                                       |                                        |                                                     |
| Bordeaux                                       | 3651 (78.3)                           | 922 (52.1)                             | 3651 (78.3)                                         |
| Bordeaux-Montaigne                             | 769 (16.5)                            | 525 (29.7)                             | 769 (16.5)                                          |
| Other or unknown                               | 244 (5.2)                             | 321 (18.2)                             | 244 (5.2)                                           |
| <b>First year of study <sup>a</sup></b>        | 1785 (38.6)                           | 694 (39.3)                             | 1525 (32.7)                                         |
| <b>Scholarship <sup>b</sup></b>                | 1949 (41.8)                           | 798 (45.1)                             | 2102 (45.1)                                         |
| <b>High perceived stress <sup>c</sup></b>      | 1893 (40.6)                           | 1033 (58.5)                            | 2556 (54.9)                                         |
| <b>Past history of depression <sup>d</sup></b> | 489 (10.5)                            | 327 (18.5)                             | 873 (18.7)                                          |

| Characteristic, N (%)                        | Pre-pandemic sample (N = 4664) | Post-pandemic sample (N = 1768) | Standardized post-pandemic sample (N = 4664) |
|----------------------------------------------|--------------------------------|---------------------------------|----------------------------------------------|
| Past history of suicide attempt <sup>e</sup> | 254 (5.4)                      | 206 (11.7)                      | 514 (11.0)                                   |
| Depressive symptoms <sup>f</sup>             | 1194 (25.6)                    | 765 (43.3)                      | 1891 (40.6)                                  |
| Suicidal ideation                            | 982 (21.1)                     | 541 (30.6)                      | 1366 (29.3)                                  |

231 <sup>a</sup>Missing data for 38 participants in the pre-epidemic sample.  
 232 <sup>b</sup>Missing data for 4 participants in the pre-epidemic sample.  
 233 <sup>c</sup>Missing data for 2 participants in the post-epidemic sample, and 5 in the standardized post-epidemic; Score  $\geq 8$  used to define high  
 234 perceived stress, using the PSS-4 scale.  
 235 <sup>d</sup>Missing data for 1 participant in the post-epidemic sample, and 3 in the standardized post-epidemic sample.  
 236 <sup>e</sup>Missing data for 76 participants in the pre-epidemic sample.  
 237 <sup>f</sup>Score  $\geq 10$  used to define the presence of depressive symptoms, using the PHQ-9 scale.  
 238

239  
240

241 **Table 2. Association Between the Pandemic Period and Depressive Symptoms and Suicidal**  
 242 **Ideation**

243

|                                        | Depressive symptoms         |                                           |                                           | Suicidal ideation           |                                           |                                           |
|----------------------------------------|-----------------------------|-------------------------------------------|-------------------------------------------|-----------------------------|-------------------------------------------|-------------------------------------------|
|                                        | OR<br>(95%CI)<br>(n = 6432) | aOR <sup>a</sup><br>(95%CI)<br>(n = 6432) | aOR <sup>b</sup><br>(95%CI)<br>(n = 6427) | OR<br>(95%CI)<br>(n = 6432) | aOR <sup>a</sup><br>(95%CI)<br>(n = 6432) | aOR <sup>b</sup><br>(95%CI)<br>(n = 6352) |
| <b>Period</b>                          |                             |                                           |                                           |                             |                                           |                                           |
| Pre-pandemic period                    | <b>Ref</b>                  | <b>Ref</b>                                | <b>Ref</b>                                | <b>Ref</b>                  | <b>Ref</b>                                | <b>Ref</b>                                |
| Post-pandemic period                   | <b>2.22</b><br>(1.98-2.49)  | <b>2.01</b><br>(1.78-2.27)                | <b>1.89</b><br>(1.67-2.13)                | <b>1.65</b><br>(1.46-1.87)  | <b>1.55</b><br>(1.36-1.76)                | <b>1.46</b><br>(1.28-1.67)                |
| <b>Gender</b>                          |                             |                                           |                                           |                             |                                           |                                           |
| Male                                   |                             | <b>Ref</b>                                | <b>Ref</b>                                |                             | <b>Ref</b>                                | <b>Ref</b>                                |
| Female                                 |                             | <b>1.81</b><br>(1.57-2.10)                | <b>1.72</b><br>(1.48-2.00)                |                             | 0.98<br>(0.85-1.13)                       | 0.92<br>(0.80-1.07)                       |
| <b>Age</b>                             |                             | <b>0.94</b><br>(0.92-0.96)                | <b>0.92</b><br>(0.90-0.95)                |                             | 0.994<br>(0.97-1.02)                      | 0.98<br>(0.96-1.01)                       |
| <b>University campus</b>               |                             |                                           |                                           |                             |                                           |                                           |
| Bordeaux                               |                             | <b>Ref</b>                                | <b>Ref</b>                                |                             | <b>Ref</b>                                | <b>Ref</b>                                |
| Bordeaux-Montaigne                     |                             | <b>1.54</b><br>(1.35-1.76)                | <b>1.39</b><br>(1.21-1.59)                |                             | <b>1.73</b><br>(1.51-1.99)                | <b>1.55</b><br>(1.33-1.79)                |
| Other or unknown                       |                             | 1.07<br>(0.88-1.30)                       | 1.09<br>(0.89-1.33)                       |                             | 0.94<br>(0.76-1.17)                       | 1.01<br>(0.81-1.26)                       |
| <b>Scholarship</b>                     |                             |                                           | <b>1.20</b><br>(1.07-1.35)                |                             |                                           | 1.12<br>(0.99-1.27)                       |
| <b>Past history of depression</b>      |                             |                                           | <b>2.95</b><br>(2.52-3.46)                |                             |                                           |                                           |
| <b>Past history of suicide attempt</b> |                             |                                           |                                           |                             |                                           | <b>5.22</b><br>(4.27-6.39)                |

244

245 Abbreviation: OR, odds ratio; aOR, adjusted odds ratio; 95% CI, confidence interval 95%.

246 <sup>a</sup> Adjusted for gender, age, and university campus.

247 <sup>b</sup> Adjusted for gender, age, university campus, scholarship, and past history of depression (for depressive symptoms) or suicide attempt (for  
248 suicidal ideation).

249

250

251 **Data Sharing Statement**

252 In accordance with the General Data Protection Regulation (GDPR), the data sets used and/or analyzed  
253 during the current study are available from the corresponding author on reasonable request.

254

255 **Authorship contribution statement**

256 MM, EP, HJG, and CT designed the study. LC conducted the statistical analysis. MM and CT wrote the  
257 first draft of the manuscript. All authors contributed to editing the manuscript and commenting on the  
258 final version.

259

260 **Declaration of Competing Interest**

261 None

262

263 **Role of the Funding Source**

264 The i-Share study was supported by an unrestricted grant of the Nouvelle-Aquitaine Regional Council  
265 (Conseil Régional Nouvelle-Aquitaine, grant N° 4370420), the Bordeaux ‘Initiatives d’excellence’  
266 (IdEx) program of the University of Bordeaux (ANR-10-IDEX-03-02), the Nouvelle-Aquitaine  
267 Regional Health Agency (Agence Régionale de Santé Nouvelle-Aquitaine, grant N°6066R-8), Public  
268 Health France (Santé Publique France, grant N°19DPPP023-0), and The National Institute against  
269 cancer INCa (grant N°INCa\_11502). Prisme was supported by the Augmented university for Campus  
270 and world Transition (ACT) project of the University of Bordeaux, with the support of the Agence  
271 Nationale de la Recherche under the “Programme d'Investissements d'avenir” with the reference ANR-  
272 20-IDES-0001, and by Inserm. The funding bodies were not involved in the study design, or in the data  
273 collection, analysis, or interpretation.

274

275 **Acknowledgements**

276 The authors are indebted to the Healthy team (Bordeaux Population Health, Inserm) for their  
277 contributions, and Kappa Santé/Kap Code teams for their technical expertise. The authors thank all the  
278 students that participated in the i-Share and Prisme studies.

## 279 **References**

- 280 Appleby, L., Richards, N., Ibrahim, S., Turnbull, P., Rodway, C., Kapur, N., 2021. Suicide in England  
281 in the COVID-19 pandemic: Early observational data from real time surveillance. *Lancet Reg*  
282 *Health Eur* 4 :100110. [https://doi : 10.1016/j.lanep.2021](https://doi.org/10.1016/j.lanep.2021).
- 283 Arsandaux, J., Montagni, I., Macalli, M., Texier, N., Pouriel, M., Germain, R., Mebarki, A., Kinouani,  
284 S., Tournier, M., Schuck, S., Tzourio, C., 2021. Mental health condition of college students  
285 compared to non-students during COVID-19 lockdown: the CONFINS study. *BMJ Open* 11,  
286 e053231. <https://doi.org/10.1136/bmjopen-2021-053231>.
- 287 Auerbach, R.P., Mortier, P., Bruffaerts, R., Alonso, J., Benjet, C., Cuijpers, P., Demyttenaere, K.,  
288 Ebert, D.D., Green, J.G., Hasking, P., Murray, E., Nock, M.K., Pinder-Amaker, S., Sampson,  
289 N.A., Stein, D.J., Vilagut, G., Zaslavsky, A.M., Kessler, R.C., WHO WMH-ICS Collaborators,  
290 2018. WHO World Mental Health Surveys International College Student Project: Prevalence and  
291 distribution of mental disorders. *J Abnorm Psychol* 127, 623–638.  
292 <https://doi.org/10.1037/abn0000362>.
- 293 Bliddal, M., Rasmussen, L., Andersen, J.H., Jensen, P.B., Pottegård, A., Munk-Olsen, T., Kildegaard,  
294 H., Wesselhoeft, R., 2023. Psychotropic Medication Use and Psychiatric Disorders During the  
295 COVID-19 Pandemic Among Danish Children, Adolescents, and Young Adults. *JAMA Psy* 80,  
296 176–180. <https://doi.org/10.1001/jamapsychiatry.2022.4165>.
- 297 Brailovskaia, J., Teismann, T., Friedrich, S., Schneider, S., Margraf, J., 2021. Suicide ideation during  
298 the COVID-19 outbreak in German university students: Comparison with pre-COVID 19 rates. *J*  
299 *Affect Disord Rep* 6:100228. [https://doi: 10.1016/j.jadr.2021.100228](https://doi.org/10.1016/j.jadr.2021.100228).
- 300 Buizza, C., Ferrari, C., Sbravati, G., Dagani, J., Cela, H., Rainieri, G., Ghilardi, A., 2023. Impact of  
301 COVID-19 Pandemic on Well-Being, Social Relationships and Academic Performance in a  
302 Sample of University Freshmen: A Propensity Score Match Evaluation Pre- and Post-Pandemic.  
303 *Int J Environ Res Public Health* 31;20(15):6485. [https://doi: 10.3390/ijerph20156485](https://doi.org/10.3390/ijerph20156485).
- 304 Chen, H., Feng, H., Liu, Y., Wu, S., Li, H., Zhang, G., Yang, P., Zhang, K., 2023. Anxiety,  
305 depression, insomnia, and PTSD among college students after optimizing the COVID-19 response  
306 in China. *J Affect Disord* 15;337:50-56. [https://doi: 10.1016/j.jad.2023.05.076](https://doi.org/10.1016/j.jad.2023.05.076).

- 307 Cheng, J., Liao, M., He, Z., Xiong, R., Ju, Y., Liu, J., Liu, B., Wu, B., Zhang, Y., 2023. Mental health  
308 and cognitive function among medical students after the COVID-19 pandemic in China. *Front*  
309 *Public Health* 11:1233975. <https://doi: 10.3389/fpubh.2023.1233975>.
- 310 COVID-19 Mental Disorders Collaborators, 2021. Global prevalence and burden of depressive and  
311 anxiety disorders in 204 countries and territories in 2020 due to the COVID-19 pandemic. *Lancet*  
312 398, 1700–1712. [https://doi.org/10.1016/S0140-6736\(21\)02143-7](https://doi.org/10.1016/S0140-6736(21)02143-7).
- 313 Danielsen, S., Joensen, A., Andersen, P.K., Madsen, T., Strandberg-Larsen, K., 2023. Self-injury,  
314 suicidality and eating disorder symptoms in young adults following COVID-19 lockdowns in  
315 Denmark. *Nat Hum Behav* 7, 411–419. <https://doi.org/10.1038/s41562-022-01511-7>.
- 316 Ettman, C.K., Abdalla, S.M., Cohen, G.H., Sampson, L., Vivier, P.M., Galea S., 2020. Prevalence of  
317 Depression Symptoms in US Adults Before and During the COVID-19 Pandemic. *JAMA Netw*  
318 *Open* 1;3(9): e2019686. <https://doi: 10.1001/jamanetworkopen.2020.19686>.
- 319 Giannouli, V., Giannoulis, K., 2023. Better Understand to Better Predict Subjective Well-Being  
320 Among Older Greeks in COVID-19 Era: Depression, Anxiety, Attitudes Towards eHealth,  
321 Religiousness, Spiritual Experience, and Cognition. *Adv Exp Med Biol* 1425:359-364. [https://doi:](https://doi: 10.1007/978-3-031-31986-0_35)  
322 [10.1007/978-3-031-31986-0\\_35](https://doi: 10.1007/978-3-031-31986-0_35). PMID: 37581810.
- 323 Huang, S., Wang, D., Zhao, J., Chen, H., Ma, Z., Pan, Y., Liu, X., Fan, F., 2022. Changes in suicidal  
324 ideation and related influential factors in college students during the COVID-19 lockdown in  
325 China. *Psychiatry Res* 314, 114653. <https://doi.org/10.1016/j.psychres.2022.114653>.
- 326 Jones, L.B., Vereschagin, M., Wang, A.Y., Munthali, R.J., Pei, J., Richardson, C.G., Halli, P., Xie, H.,  
327 Rush, B., Yatham, L., Gadermann, A.M., Pendakur, K., Prescivalli, A.P., Munro, L., Bruffaerts,  
328 R., Auerbach, R.P., Mortier, P., Vigo, D.V., 2023. Suicidal Ideation Amongst University Students  
329 During the COVID-19 Pandemic: Time Trends and Risk Factors. *Can J Psychiatry* 68(7):531-546.  
330 <https://doi: 10.1177/07067437221140375>.
- 331 Knudsen, A.K.S., Stene-Larsen, K., Gustavson, K., Hotopf, M., Kessler, R.C., Krokstad, S., Skogen,  
332 J.C., Øverland, S., Reneflot, A., 2021. Prevalence of mental disorders, suicidal ideation and  
333 suicides in the general population before and during the COVID-19 pandemic in Norway: A  
334 population-based repeated cross-sectional analysis. *Lancet Reg Health Eur* 4, 100071.

- 335 <https://doi.org/10.1016/j.lanepe.2021.100071>.
- 336 Kroenke, K., Spitzer, R.L., Williams, J.B., 2001. The PHQ-9: validity of a brief depression severity  
337 measure. *J Gen Intern Med* 16, 606–613. <https://doi.org/10.1046/j.1525-1497.2001.016009606.x>.
- 338 Lee, A.M., Wong, J.G.W.S., McAlonan, G.M., Cheung, V., Cheung, C., Sham, P.C., Chu, C.-M.,  
339 Wong, P.-C., Tsang, K.W.T., Chua, S.E., 2007. Stress and psychological distress among SARS  
340 survivors 1 year after the outbreak. *Can J Psychiatry* 52, 233–240.  
341 <https://doi.org/10.1177/070674370705200405>.
- 342 Léon, C., du Roscoät, E., Beck, F. Prévalence des épisodes dépressifs en France chez les 18-85 ans:  
343 résultats du Baromètre santé 2021, 2023 [in french]. *Bull Épidémiol Hebd* 2:28-40  
344 [http://beh.santepubliquefrance.fr/beh/2023/2/2023\\_2\\_1.html](http://beh.santepubliquefrance.fr/beh/2023/2/2023_2_1.html). (accessed March 3, 2023).
- 345 Levis, B., Benedetti, A., Thombs, B.D., 2019. DEPRESSion Screening Data (DEPRESSD)  
346 Collaboration. Accuracy of Patient Health Questionnaire-9 (PHQ-9) for screening to detect major  
347 depression: individual participant data meta-analysis. *BMJ* 9;365:11476. [https://doi:  
348 10.1136/bmj.11476](https://doi:10.1136/bmj.11476).
- 349 López Steinmetz, L.C., Fong, S.B., Godoy, J.C., 2021. Suicidal risk and impulsivity-related traits  
350 among young Argentinean college students during a quarantine of up to 103-day duration:  
351 Longitudinal evidence from the COVID-19 pandemic. *Suicide Life Threat Behav* 51(6):1175–88.  
352 [https://doi: 10.1111/sltb.12799](https://doi:10.1111/sltb.12799).
- 353 Macalli, M., Côté, S., Tzourio, C., 2020. Perceived parental support in childhood and adolescence as a  
354 tool for mental health screening in students: A longitudinal study in the i-Share cohort. *J Affect  
355 Disord* 266, 512–519. <https://doi.org/10.1016/j.jad.2020.02.009>.
- 356 Macalli, M., Texier, N., Schück, S., Côté, S.M., Tzourio, C., 2021. A repeated cross-sectional analysis  
357 assessing mental health conditions of adults as per student status during key periods of the  
358 COVID-19 epidemic in France. *Sci Rep* 11, 21455. <https://doi.org/10.1038/s41598-021-00471-8>.
- 359 McLafferty, M., Brown, N., McHugh, R., Ward, C., Stevenson, A., McBride, L., Brady, J., Bjourson,  
360 A.J., O'Neill, S.M., Walsh, C.P., Murray, E.K., 2021. Depression, anxiety and suicidal behaviour  
361 among college students: Comparisons pre-COVID-19 and during the pandemic. *Psychiatry Res  
362 Commun* 1(2):100012. [https://doi: 10.1016/j.psycom.2021](https://doi:10.1016/j.psycom.2021).

363 Pirkis, J., John, A., Shin, S., DelPozo-Banos, M., Arya, V., Analuisa-Aguilar, P., Appleby, L.,  
364 Arensman, E., Bantjes, J., Baran, A., Bertolote, J.M., Borges, G., Brečić, P., Caine, E.,  
365 Castelpietra, G., Chang, S.-S., Colchester, D., Crompton, D., Curkovic, M., Deisenhammer, E.A.,  
366 Du, C., Dwyer, J., Erlangsen, A., Faust, J.S., Fortune, S., Garrett, A., George, D., Gerstner, R.,  
367 Gilissen, R., Gould, M., Hawton, K., Kanter, J., Kapur, N., Khan, M., Kirtley, O.J., Knipe, D.,  
368 Kolves, K., Leske, S., Marahatta, K., Mittendorfer-Rutz, E., Neznanov, N., Niederkrotenthaler, T.,  
369 Nielsen, E., Nordentoft, M., Oberlerchner, H., O'Connor, R.C., Pearson, M., Phillips, M.R., Platt,  
370 S., Plener, P.L., Psota, G., Qin, P., Radeloff, D., Rados, C., Reif, A., Reif-Leonhard, C., Rozanov,  
371 V., Schlang, C., Schneider, B., Semenova, N., Sinyor, M., Townsend, E., Ueda, M., Vijayakumar,  
372 L., Webb, R.T., Weerasinghe, M., Zalsman, G., Gunnell, D., Spittal, M.J., 2021. Suicide trends in  
373 the early months of the COVID-19 pandemic: an interrupted time-series analysis of preliminary  
374 data from 21 countries. *Lancet Psychiatry* 8, 579–588. [https://doi.org/10.1016/S2215-](https://doi.org/10.1016/S2215-0366(21)00091-2)  
375 [0366\(21\)00091-2](https://doi.org/10.1016/S2215-0366(21)00091-2).  
376 Viner, R., Russell, S., Saule, R., Croker, H., Stansfield, C., Packer, J., Nicholls, D., Goddings, A.L.,  
377 Bonell, C., Hudson, L., Hope, S., Ward, J., Schwalbe, N., Morgan, A., Minozzi, S., 2022. School  
378 Closures During Social Lockdown and Mental Health, Health Behaviors, and Well-being Among  
379 Children and Adolescents During the First COVID-19 Wave: A Systematic Review. *JAMA*  
380 *Pediatr.* 1;176(4):400-409. [https://doi: 10.1001/jamapediatrics.2021.5840](https://doi:10.1001/jamapediatrics.2021.5840).  
381 Wang, S., Chen, L., Ran, H., Che, Y., Fang, D., Sun, H., Peng, J., Liang, X., Xiao, Y., 2022.  
382 Depression and anxiety among children and adolescents pre and post COVID-19: A comparative  
383 meta-analysis. *Front Psychiatry* 13, 917552. <https://doi.org/10.3389/fpsyt.2022.917552>.  
384 Wathelet, M., Duhem, S., Vaiva, G., Baubet, T., Habran, E., Veerapa, E., Debien, C., Molenda, S.,  
385 Horn, M., Grandgenèvre, P., Notredame, C.-E., D'Hondt, F., 2020. Factors Associated With  
386 Mental Health Disorders Among University Students in France Confined During the COVID-19  
387 Pandemic. *JAMA Netw Open* 3, e2025591.  
388 <https://doi.org/10.1001/jamanetworkopen.2020.25591>.  
389 Wathelet, M., Horn, M., Creupelandt, C., Fovet, T., Baubet, T., Habran, E., Martignène, N., Vaiva, G.,  
390 D'Hondt, F., 2022. Mental Health Symptoms of University Students 15 Months After the Onset of



391 the COVID-19 Pandemic in France. JAMA Netw Open 1;5(12):e2249342. <https://doi:>  
392 [10.1001/jamanetworkopen](https://doi.org/10.1001/jamanetworkopen).  
393 WHO, 2022. The impact of covid-19 on mental health cannot be made light of.  
394 [https://www.who.int/news-room/feature-stories/detail/the-impact-of-covid-19-on-mental-health-](https://www.who.int/news-room/feature-stories/detail/the-impact-of-covid-19-on-mental-health-cannot-be-made-light-of)  
395 [cannot-be-made-light-of](https://www.who.int/news-room/feature-stories/detail/the-impact-of-covid-19-on-mental-health-cannot-be-made-light-of). (accessed 24 October 2023).
